# Supplementary material for: Does Online Implementation Make a Difference in the Effects of a Mental Health Curriculum at Schools?
Source: MDPI journal article supplement (doi:10.3390/ijerph192416990), 2022-12-17
Supplement: s1 [file s1]

**Table S1.** Mental Health for mixed and onsite implementation groups across the two time periods. P-values for interaction (Type x Time), time, and type effects.

|                       | Onsite |      |      |      |      | Mixed |      |      |      |      | <i>F test, effect size</i>                             |                                                         |                                               |
|-----------------------|--------|------|------|------|------|-------|------|------|------|------|--------------------------------------------------------|---------------------------------------------------------|-----------------------------------------------|
|                       | Pre    |      | Post |      |      | Pre   |      | Post |      |      | Type effects                                           | Time effect                                             | Type x Time Interaction                       |
|                       | n      | M    | SD   | M    | SD   | n     | M    | SD   | M    | SD   |                                                        |                                                         |                                               |
| Internalized Problems |        | 0.42 | 0.35 | 0.35 | 0.34 |       | 0.39 | 0.34 | 0.30 | 0.33 | $F(1, 931) = 3.95, p = \mathbf{0.047}, \eta^2 = 0.004$ | $F(1, 931) = 53.32, p < \mathbf{0.001}, \eta^2 = 0.054$ | $F(1, 931) = 1.37, p = 0.243, \eta^2 = 0.001$ |
| Externalized Problems | 348    | 0.53 | 0.43 | 0.47 | 0.42 | 585   | 0.49 | 0.44 | 0.46 | 0.43 | $F(1, 931) = 0.70, p = 0.402, \eta^2 = 0.001$          | $F(1, 931) = 19.96, p < \mathbf{0.001}, \eta^2 = 0.021$ | $F(1, 931) = 2.03, p = 0.155, \eta^2 = 0.002$ |
| Prosocial Behavior    |        | 1.58 | 0.47 | 1.60 | 0.45 |       | 1.52 | 0.48 | 1.59 | 0.46 | $F(1, 931) = 1.68, p = 0.195, \eta^2 = 0.002$          | $F(1, 931) = 11.45, p < \mathbf{0.001}, \eta^2 = 0.012$ | $F(1, 931) = 3.09, p = 0.079, \eta^2 = 0.003$ |

**Table S2.** SES for mixed and onsite groups across the two time periods. *F tests* and *effect sizes* for interaction (Type x Time), time, and type effects.

|                     | Onsite |      |      |      |      | Mixed |      |      |      |      | <i>F test, effect size</i>                             |                                                         |                                                        |
|---------------------|--------|------|------|------|------|-------|------|------|------|------|--------------------------------------------------------|---------------------------------------------------------|--------------------------------------------------------|
|                     | Pre    |      | Post |      |      | Pre   |      | Post |      |      | Type effect                                            | Time effect                                             | Type x Time Interaction                                |
|                     | n      | M    | SD   | M    | SD   | n     | M    | SD   | M    | SD   |                                                        |                                                         |                                                        |
| Self-awareness      |        | 2.93 | 0.57 | 3.07 | 0.51 |       | 2.98 | 0.64 | 3.17 | 0.62 | $F(1, 928) = 3.83, p = 0.051, \eta^2 = 0.004$          | $F(1, 928) = 84.65, p < \mathbf{0.001}, \eta^2 = 0.084$ | $F(1, 928) = 2.53, p = 0.112, \eta^2 = 0.003$          |
| Self-regulation     |        | 2.96 | 0.63 | 3.04 | 0.66 |       | 2.99 | 0.72 | 3.08 | 0.70 | $F(1, 928) = 0.80, p = 0.373, \eta^2 = 0.001$          | $F(1, 928) = 25.43, p < \mathbf{0.001}, \eta^2 = 0.027$ | $F(1, 928) = 0.06, p = \mathbf{0.806}, \eta^2 = 0.000$ |
| Social Awareness    | 348    | 3.22 | 0.61 | 3.26 | 0.55 | 582   | 3.19 | 0.63 | 3.34 | 0.59 | $F(1, 928) = 0.55, p = 0.459, \eta^2 = 0.001$          | $F(1, 928) = 27.52, p < \mathbf{0.001}, \eta^2 = 0.029$ | $F(1, 928) = 7.75, p = \mathbf{0.005}, \eta^2 = 0.008$ |
| Relationship Skills |        | 3.19 | 0.54 | 3.27 | 0.51 |       | 3.25 | 0.58 | 3.41 | 0.58 | $F(1, 928) = 7.65, p = \mathbf{0.006}, \eta^2 = 0.008$ | $F(1, 928) = 52.34, p < \mathbf{0.001}, \eta^2 = 0.053$ | $F(1, 928) = 6.43, p = \mathbf{0.011}, \eta^2 = 0.007$ |

|                             |      |      |      |      |      |      |      |      |                                                        |                                                         |                                                        |
|-----------------------------|------|------|------|------|------|------|------|------|--------------------------------------------------------|---------------------------------------------------------|--------------------------------------------------------|
| Responsible Decision Making | 3.23 | 0.61 | 3.29 | 0.58 | 3.28 | 0.65 | 3.42 | 0.63 | $F(1, 928) = 4.94, p = \mathbf{0.026}, \eta^2 = 0.005$ | $F(1, 928) = 31.09, p < \mathbf{0.001}, \eta^2 = 0.032$ | $F(1, 928) = 5.09, p = \mathbf{0.024}, \eta^2 = 0.005$ |
|-----------------------------|------|------|------|------|------|------|------|------|--------------------------------------------------------|---------------------------------------------------------|--------------------------------------------------------|

**Table S3.** Academic Outcomes for mixed and onsite groups across the two time periods. Mean values, Standard Deviations, *F tests*, and *effect sizes* for interaction (Type x Time), time, and type effects.

|                        | Onsite |      |      |      |      | Mixed |      |      |      |      | <i>F test, effect size</i>                             |                                                         |                                                        |
|------------------------|--------|------|------|------|------|-------|------|------|------|------|--------------------------------------------------------|---------------------------------------------------------|--------------------------------------------------------|
|                        | Pre    |      | Post |      |      | Pre   |      | Post |      |      | Type effect                                            | Time effect                                             | Type x Time Interaction                                |
|                        | n      | M    | SD   | M    | SD   | n     | M    | SD   | M    | SD   |                                                        |                                                         |                                                        |
| Academic Motivation    |        | 3.83 | 1.01 | 3.92 | 1.08 |       | 3.68 | 0.97 | 3.75 | 1.01 | $F(1, 930) = 6.36, p = \mathbf{0.012}, \eta^2 = 0.007$ | $F(1, 930) = 10.25, p = \mathbf{0.001}, \eta^2 = 0.011$ | $F(1, 930) = 0.18, p = 0.676, \eta^2 = 0.000$          |
| Engagement in Learning | 348    | 3.79 | 1.04 | 3.85 | 1.02 | 584   | 3.66 | 0.96 | 3.76 | 1.01 | $F(1, 930) = 3.29, p = 0.070, \eta^2 = 0.004$          | $F(1, 930) = 10.83, p = \mathbf{0.001}, \eta^2 = 0.012$ | $F(1, 930) = 0.53, p = 0.465, \eta^2 = 0.001$          |
| Academic Achievement   |        | 3.75 | 1.01 | 3.82 | 1.01 |       | 3.55 | 0.89 | 3.74 | 0.96 | $F(1, 930) = 5.43, p = \mathbf{0.020}, \eta^2 = 0.006$ | $F(1, 930) = 33.17, p < \mathbf{0.001}, \eta^2 = 0.034$ | $F(1, 930) = 7.19, p = \mathbf{0.007}, \eta^2 = 0.008$ |

**Table S4.** Mental Health for School Level and the number of online activities across the two time periods. Mean values, Standard Deviations.

| K – 4 <sup>th</sup>   |     |      |      |      |      |     |      |      |      | 5 <sup>th</sup> – 12 <sup>th</sup> |     |      |      |      |      |     |      |      |      |      |
|-----------------------|-----|------|------|------|------|-----|------|------|------|------------------------------------|-----|------|------|------|------|-----|------|------|------|------|
| 1                     |     |      |      |      | 2    |     |      |      |      | 1                                  |     |      |      |      | 2    |     |      |      |      |      |
| Pre                   |     |      |      |      | Post |     |      |      |      | Pre                                |     |      |      |      | Post |     |      |      |      |      |
|                       | n   | M    | SD   | M    | SD   | n   | M    | SD   | M    | SD                                 | n   | M    | SD   | M    | SD   | n   | M    | SD   | M    | SD   |
| Internalized Problems |     | 0.48 | 0.35 | 0.29 | 0.31 |     | 0.28 | 0.24 | 0.22 | 0.24                               |     | 0.40 | 0.37 | 0.31 | 0.34 |     | 0.40 | 0.35 | 0.36 | 0.35 |
| Externalized Problems | 115 | 0.65 | 0.45 | 0.49 | 0.40 | 143 | 0.47 | 0.39 | 0.47 | 0.43                               | 138 | 0.50 | 0.48 | 0.49 | 0.48 | 189 | 0.41 | 0.41 | 0.42 | 0.42 |
| Prosocial Behavior    |     | 1.50 | 0.49 | 1.74 | 0.34 |     | 1.52 | 0.48 | 1.57 | 0.47                               |     | 1.62 | 0.45 | 1.64 | 0.45 |     | 1.45 | 0.49 | 1.47 | 0.49 |

**Table S5.** Mental Health for School Level and the number of online activities across the two time periods. *F tests* and *effect sizes* for interaction within subjects.*F test and effect size Within Subjects*

|                       | Time effect                                               | Time x Group                                              | Time x School Level                                       | Time x Group x School Level                              |
|-----------------------|-----------------------------------------------------------|-----------------------------------------------------------|-----------------------------------------------------------|----------------------------------------------------------|
| Internalized Problems | $F(1, 581) = 56.44, p < \mathbf{0.001}, \eta_p^2 = 0.089$ | $F(1, 581) = 13.02, p < \mathbf{0.001}, \eta_p^2 = 0.022$ | $F(1, 581) = 5.75, p = \mathbf{0.017}, \eta_p^2 = 0.010$  | $F(1, 581) = 2.61, p = 0.107, \eta_p^2 = 0.004$          |
| Externalized Problems | $F(1, 581) = 10.35, p = \mathbf{0.001}, \eta_p^2 = 0.018$ | $F(1, 581) = 14.81, p < \mathbf{0.001}, \eta_p^2 = 0.025$ | $F(1, 581) = 11.87, p < \mathbf{0.001}, \eta_p^2 = 0.020$ | $F(1, 581) = 9.83, p = \mathbf{0.002}, \eta_p^2 = 0.017$ |
| Prosocial Behavior    | $F(1, 581) = 24.25, p < \mathbf{0.001}, \eta_p^2 = 0.040$ | $F(1, 581) = 8.76, p = \mathbf{0.003}, \eta_p^2 = 0.015$  | $F(1, 581) = 13.94, p < \mathbf{0.001}, \eta_p^2 = 0.023$ | $F(1, 581) = 8.86, p = \mathbf{0.003}, \eta_p^2 = 0.015$ |

**Table S6.** Mental Health for School Level and the number of online activities across the two time periods. *F tests* and *effect sizes* for interaction between subjects.

| <i>F test and effect size Between Subjects</i> |                                                           |                                                          |                                                           |
|------------------------------------------------|-----------------------------------------------------------|----------------------------------------------------------|-----------------------------------------------------------|
|                                                | Group effect                                              | School Level                                             | Group x School Level                                      |
| Internalized Problems                          | $F(1, 581) = 4.97, p = \mathbf{0.026}, \eta_p^2 = 0.008$  | $F(1, 581) = 5.01, p = \mathbf{0.026}, \eta_p^2 = 0.009$ | $F(1, 581) = 11.68, p < \mathbf{0.001}, \eta_p^2 = 0.020$ |
| Externalized Problems                          | $F(1, 581) = 6.33, p = \mathbf{0.012}, \eta_p^2 = 0.011$  | $F(1, 581) = 3.56, p = 0.060, \eta_p^2 = 0.006$          | $F(1, 581) = 0.11, p = 0.741, \eta_p^2 = 0.000$           |
| Prosocial Behavior                             | $F(1, 581) = 12.67, p < \mathbf{0.001}, \eta_p^2 = 0.021$ | $F(1, 581) = 1.01, p = 0.317, \eta_p^2 = 0.002$          | $F(1, 581) = 2.08, p = 0.150, \eta_p^2 = 0.004$           |

**Table S7.** SES for School Level and the number of online activities across the two time periods. Mean values, Standard Deviations.

| K – 4 <sup>th</sup>         |     |      |      |      |      |      |      |      |      |      | 5 <sup>th</sup> – 12 <sup>th</sup> |      |      |      |      |      |      |      |      |      |
|-----------------------------|-----|------|------|------|------|------|------|------|------|------|------------------------------------|------|------|------|------|------|------|------|------|------|
| 1                           |     |      |      |      |      | 2    |      |      |      |      | 1                                  |      |      |      |      | 2    |      |      |      |      |
| Pre                         |     |      |      |      |      | Post |      |      |      |      | Pre                                |      |      |      |      | Post |      |      |      |      |
|                             | n   | M    | SD   | M    | SD   | n    | M    | SD   | M    | SD   | n                                  | M    | SD   | M    | SD   | n    | M    | SD   | M    | SD   |
| Self-awareness              |     | 2.86 | 0.67 | 3.36 | 0.53 |      | 3.05 | 0.63 | 3.33 | 0.53 |                                    | 2.99 | 0.65 | 3.06 | 0.66 |      | 2.98 | 0.63 | 3.01 | 0.63 |
| Self-regulation             |     | 2.82 | 0.73 | 3.13 | 0.64 |      | 3.00 | 0.66 | 3.15 | 0.62 |                                    | 2.99 | 0.84 | 2.92 | 0.79 |      | 3.09 | 0.65 | 3.11 | 0.71 |
| Social Awareness            | 115 | 3.05 | 0.66 | 3.52 | 0.52 | 141  | 3.29 | 0.63 | 3.43 | 0.57 | 138                                | 3.25 | 0.69 | 3.27 | 0.62 | 188  | 3.17 | 0.55 | 3.21 | 0.61 |
| Relationship Skills         |     | 3.16 | 0.57 | 3.57 | 0.49 |      | 3.42 | 0.56 | 3.55 | 0.55 |                                    | 3.24 | 0.59 | 3.32 | 0.61 |      | 3.19 | 0.57 | 3.27 | 0.58 |
| Responsible Decision Making |     | 3.11 | 0.72 | 3.50 | 0.53 |      | 3.32 | 0.63 | 3.47 | 0.61 |                                    | 3.33 | 0.71 | 3.35 | 0.68 |      | 3.31 | 0.57 | 3.39 | 0.64 |

**Table S8.** SES for School Level and the number of online activities across the two time periods. *F tests* and *effect sizes* for interaction within subjects.

| <i>F test and effect size Within Subjects</i> |                                                  |                                                  |                                                  |                                                  |
|-----------------------------------------------|--------------------------------------------------|--------------------------------------------------|--------------------------------------------------|--------------------------------------------------|
|                                               | Time effect                                      | Time x Group                                     | Time x School Level                              | Time x Group x School Level                      |
| Self-awareness                                | $F(1, 578) = 99.19, p < 0.001, \eta_p^2 = 0.146$ | $F(1, 578) = 8.77, p = 0.003, \eta_p^2 = 0.015$  | $F(1, 578) = 58.06, p < 0.001, \eta_p^2 = 0.091$ | $F(1, 578) = 3.70, p = 0.055, \eta_p^2 = 0.006$  |
| Self-regulation                               | $F(1, 578) = 24.97, p < 0.001, \eta_p^2 = 0.041$ | $F(1, 578) = 0.88, p = 0.349, \eta_p^2 = 0.002$  | $F(1, 578) = 39.12, p < 0.001, \eta_p^2 = 0.063$ | $F(1, 578) = 9.30, p = 0.002, \eta_p^2 = 0.016$  |
| Social Awareness                              | $F(1, 578) = 58.13, p < 0.001, \eta_p^2 = 0.091$ | $F(1, 578) = 12.53, p < 0.001, \eta_p^2 = 0.021$ | $F(1, 578) = 39.47, p < 0.001, \eta_p^2 = 0.064$ | $F(1, 578) = 17.20, p < 0.001, \eta_p^2 = 0.029$ |
| Relationship Skills                           | $F(1, 578) = 73.11, p < 0.001, \eta_p^2 = 0.112$ | $F(1, 578) = 11.13, p < 0.001, \eta_p^2 = 0.019$ | $F(1, 578) = 19.87, p < 0.001, \eta_p^2 = 0.033$ | $F(1, 578) = 10.77, p = 0.001, \eta_p^2 = 0.018$ |
| Responsible Decision Making                   | $F(1, 578) = 46.17, p < 0.001, \eta_p^2 = 0.074$ | $F(1, 578) = 3.98, p = 0.047, \eta_p^2 = 0.007$  | $F(1, 578) = 21.96, p < 0.001, \eta_p^2 = 0.037$ | $F(1, 578) = 11.11, p < 0.001, \eta_p^2 = 0.019$ |

**Table S9.** SES for School Level and the number of online activities across the two time periods. *F tests* and *effect sizes* for interaction between subjects.

| <i>F test and effect size Between Subjects</i> |                                                  |                                                  |                                                 |
|------------------------------------------------|--------------------------------------------------|--------------------------------------------------|-------------------------------------------------|
|                                                | Group effect                                     | School Level effect                              | Group x School Level                            |
| Self-awareness                                 | $F(1, 578) = 0.210, p = 0.625, \eta_p^2 = 0.000$ | $F(1, 578) = 8.40, p = 0.004, \eta_p^2 = 0.014$  | $F(1, 578) = 1.30, p = 0.255, \eta_p^2 = 0.002$ |
| Self-regulation                                | $F(1, 578) = 4.63, p = 0.032, \eta_p^2 = 0.008$  | $F(1, 578) = 0.00, p = 0.972, \eta_p^2 = 0.000$  | $F(1, 578) = 0.10, p = 0.758, \eta_p^2 = 0.000$ |
| Social Awareness                               | $F(1, 578) = 0.00, p = 0.947, \eta_p^2 = 0.000$  | $F(1, 578) = 4.65, p = 0.031, \eta_p^2 = 0.008$  | $F(1, 578) = 2.46, p = 0.118, \eta_p^2 = 0.004$ |
| Relationship Skills                            | $F(1, 578) = 0.60, p = 0.438, \eta_p^2 = 0.001$  | $F(1, 578) = 15.47, p < 0.001, \eta_p^2 = 0.026$ | $F(1, 578) = 4.09, p = 0.044, \eta_p^2 = 0.007$ |
| Responsible Decision Making                    | $F(1, 578) = 1.12, p = 0.290, \eta_p^2 = 0.002$  | $F(1, 578) = 0.01, p = 0.925, \eta_p^2 = 0.000$  | $F(1, 578) = 0.71, p = 0.401, \eta_p^2 = 0.001$ |

**Table S10.** Academic Outcomes for School Level and the number of online activities across the two time periods. Mean values, Standard Deviations.

| K – 4 <sup>th</sup>    |     |      |      |      |      |      |      |      |      |      | 5 <sup>th</sup> – 12 <sup>th</sup> |      |      |      |      |      |      |      |      |      |
|------------------------|-----|------|------|------|------|------|------|------|------|------|------------------------------------|------|------|------|------|------|------|------|------|------|
| 1                      |     |      |      |      |      | 2    |      |      |      |      | 1                                  |      |      |      |      | 2    |      |      |      |      |
| Pre                    |     |      |      |      |      | Post |      |      |      |      | Pre                                |      |      |      |      | Post |      |      |      |      |
|                        | n   | M    | SD   | M    | SD   | n    | M    | SD   | M    | SD   | n                                  | M    | SD   | M    | SD   | n    | M    | SD   | M    | SD   |
| Academic Motivation    |     | 3.81 | 0.99 | 4.07 | 0.94 |      | 3.77 | 0.85 | 3.95 | 0.95 |                                    | 3.72 | 1.13 | 3.62 | 1.01 |      | 3.52 | 0.91 | 3.51 | 1.01 |
| Engagement in Learning | 115 | 3.85 | 0.92 | 4.08 | 0.94 | 143  | 3.78 | 0.85 | 3.93 | 0.98 | 138                                | 3.65 | 1.05 | 3.66 | 0.98 | 188  | 3.45 | 0.96 | 3.50 | 1.03 |
| Academic Achievement   |     | 3.65 | 0.97 | 4.10 | 0.91 |      | 3.66 | 0.86 | 3.92 | 0.93 |                                    | 3.51 | 0.93 | 3.54 | 0.91 |      | 3.41 | 0.83 | 3.53 | 0.97 |

*F test and effect size Within Subjects*

|                        | Time effect                                      | Time x Group                                    | Time x School Level                              | Time x Group x School Level                     |
|------------------------|--------------------------------------------------|-------------------------------------------------|--------------------------------------------------|-------------------------------------------------|
| Academic Motivation    | $F(1, 580) = 7.37, p = 0.007, \eta_p^2 = 0.013$  | $F(1, 580) = 0.00, p = 0.995, \eta_p^2 = 0.000$ | $F(1, 580) = 20.36, p < 0.001, \eta_p^2 = 0.034$ | $F(1, 578) = 1.65, p = 0.200, \eta_p^2 = 0.003$ |
| Engagement in Learning | $F(1, 580) = 12.50, p < 0.001, \eta_p^2 = 0.021$ | $F(1, 580) = 0.07, p = 0.786, \eta_p^2 = 0.000$ | $F(1, 580) = 6.50, p = 0.011, \eta_p^2 = 0.011$  | $F(1, 580) = 1.04, p = 0.308, \eta_p^2 = 0.002$ |
| Academic Achievement   | $F(1, 580) = 51.41, p < 0.001, \eta_p^2 = 0.081$ | $F(1, 580) = 0.78, p = 0.378, \eta_p^2 = 0.001$ | $F(1, 580) = 22.34, p < 0.001, \eta_p^2 = 0.037$ | $F(1, 580) = 5.55, p = 0.019, \eta_p^2 = 0.009$ |

**Table S11.** Academic Outcomes for School Level and the number of online activities across the two time periods. *F tests* and *effect sizes* for interaction within subjects.

| <i>F test and effect size Between Subjects</i> |                                                 |                                                  |                                                 |
|------------------------------------------------|-------------------------------------------------|--------------------------------------------------|-------------------------------------------------|
|                                                | Group effect                                    | School Level effect                              | Group x School Level                            |
| Academic Motivation                            | $F(1, 580) = 2.41, p = 0.121, \eta_p^2 = 0.004$ | $F(1, 580) = 16.39, p < 0.001, \eta_p^2 = 0.027$ | $F(1, 580) = 0.26, p = 0.608, \eta_p^2 = 0.000$ |
| Engagement in Learning                         | $F(1, 580) = 3.73, p = 0.054, \eta_p^2 = 0.006$ | $F(1, 580) = 21.14, p < 0.001, \eta_p^2 = 0.035$ | $F(1, 580) = 0.24, p = 0.624, \eta_p^2 = 0.000$ |
| Academic Achievement                           | $F(1, 580) = 0.99, p = 0.320, \eta_p^2 = 0.002$ | $F(1, 580) = 22.57, p < 0.001, \eta_p^2 = 0.037$ | $F(1, 580) = 0.04, p = 0.837, \eta_p^2 = 0.000$ |

**Table S12.** Academic Outcomes for School Level and the number of online activities across the two time periods. *F tests* and *effect sizes* for interaction between subjects.

**Table S13.** SES across the two time periods considering the methodology. Means and Standard Deviations.

|                     | Online |      |      |      |      | Onsite |      |      |      |      | Mixed |      |      |      |      |
|---------------------|--------|------|------|------|------|--------|------|------|------|------|-------|------|------|------|------|
|                     | Pre    |      | Post |      |      | Pre    |      | Post |      |      | Pre   |      | Post |      |      |
|                     | n      | M    | SD   | M    | SD   | n      | M    | SD   | M    | SD   | n     | M    | SD   | M    | SD   |
| Self-awareness      | 299    | 3.04 | 0.62 | 3.17 | 0.61 | 144    | 2.89 | 0.64 | 3.03 | 0.59 | 227   | 2.99 | 0.63 | 3.11 | 0.63 |
| Self-regulation     |        | 3.05 | 0.66 | 3.14 | 0.67 |        | 2.91 | 0.70 | 3.06 | 0.71 |       | 2.97 | 0.79 | 2.99 | 0.76 |
| Social Awareness    |        | 3.25 | 0.56 | 3.32 | 0.60 |        | 3.19 | 0.67 | 3.25 | 0.61 |       | 3.25 | 0.63 | 3.31 | 0.58 |
| Relationship Skills |        | 3.32 | 0.55 | 3.42 | 0.58 |        | 3.17 | 0.61 | 3.33 | 0.58 |       | 3.25 | 0.57 | 3.33 | 0.58 |

|                             |      |      |      |      |      |      |      |      |      |      |      |      |
|-----------------------------|------|------|------|------|------|------|------|------|------|------|------|------|
| Responsible Decision Making | 3.33 | 0.59 | 3.44 | 0.63 | 3.19 | 0.68 | 3.27 | 0.67 | 3.31 | 0.68 | 3.36 | 0.64 |
|-----------------------------|------|------|------|------|------|------|------|------|------|------|------|------|

**Table S14.** SES across the two time periods considering the methodology. *F tests* and *effect sizes* for interaction (Type x Time), time, and type effects.

| <i>F test, effect size</i>  |                                                          |                                                           |                                                          |
|-----------------------------|----------------------------------------------------------|-----------------------------------------------------------|----------------------------------------------------------|
|                             | Type effect                                              | Time effect                                               | Type x Time Interaction                                  |
| Self-awareness              | $F(2, 667) = 3.02, p = \mathbf{0.049}, \eta_p^2 = 0.009$ | $F(2, 667) = 40.40, p < \mathbf{0.001}, \eta_p^2 = 0.057$ | $F(2, 667) = 0.11, p = 0.895, \eta_p^2 = 0.000$          |
| Self-regulation             | $F(2, 667) = 2.43, p = 0.089, \eta_p^2 = 0.007$          | $F(2, 667) = 19.04, p < \mathbf{0.001}, \eta_p^2 = 0.028$ | $F(2, 667) = 3.73, p = \mathbf{0.025}, \eta_p^2 = 0.011$ |
| Social Awareness            | $F(2, 667) = 0.66, p = 0.518, \eta_p^2 = 0.002$          | $F(2, 667) = 11.29, p < \mathbf{0.001}, \eta_p^2 = 0.017$ | $F(2, 667) = 0.06, p = 0.946, \eta_p^2 = 0.000$          |
| Relationship Skills         | $F(2, 667) = 4.31, p = \mathbf{0.013}, \eta_p^2 = 0.013$ | $F(2, 667) = 24.18, p < \mathbf{0.001}, \eta_p^2 = 0.035$ | $F(2, 667) = 0.17, p = 0.843, \eta_p^2 = 0.001$          |
| Responsible Decision Making | $F(2, 667) = 3.44, p = \mathbf{0.033}, \eta_p^2 = 0.010$ | $F(2, 667) = 14.95, p < \mathbf{0.001}, \eta_p^2 = 0.022$ | $F(2, 667) = 0.84, p = 0.431, \eta_p^2 = 0.003$          |



**Table S15.** Teachers' adaptations for online activities using digital resources (Number of Subjects that mention each theme and subtheme).

| Adaptations for online activities using digital resources<br>- Themes and subthemes - | Teachers |
|---------------------------------------------------------------------------------------|----------|
| <b>Synchronous</b>                                                                    | 27       |
| Digital Platforms                                                                     | 20       |
| Presentations                                                                         | 14       |
| Virtual Classrooms                                                                    | 6        |
| <b>Asynchronous</b>                                                                   | 8        |
| Execution of part of the activity                                                     | 7        |
| Extra resources                                                                       | 3        |
